# Supplementary material for: Hybrid Inhibitors of DNA Gyrase A and B: Design, Synthesis and Evaluation
Source: PubMed Central journal article supplement (PMC7822030; doi:10.3390/pharmaceutics13010006), 2020-12-22
Supplement: pharmaceutics-13-00006-s001.pdf [file pharmaceutics-13-00006-s001.pdf]

# Supplementary Materials: Hybrid Inhibitors of DNA Gyrase A and B: Design, Synthesis and Evaluation

Martina Durcik, Žiga Skok, Janez Ilaš, Nace Zidar, Anamarija Zega, Petra Éva Szili, Gábor Draskovits, Tamás Révész, Danijel Kikelj, Akos Nyerges, Csaba Pál, Lucija Peterlin Mašič and Tihomir Tomašič

## 1. Enzyme Inhibition Graphs

Dose-response curves for six hybrids active against *E. coli* DNA gyrase in supercoiling assay (Figure S1) and for four hybrids active against *E. coli* topoisomerase IV in relaxation assay (Figure S2), shown for an independent measurement. The IC<sub>50</sub> (mean ±SD) is the result of at least two independent measurements.

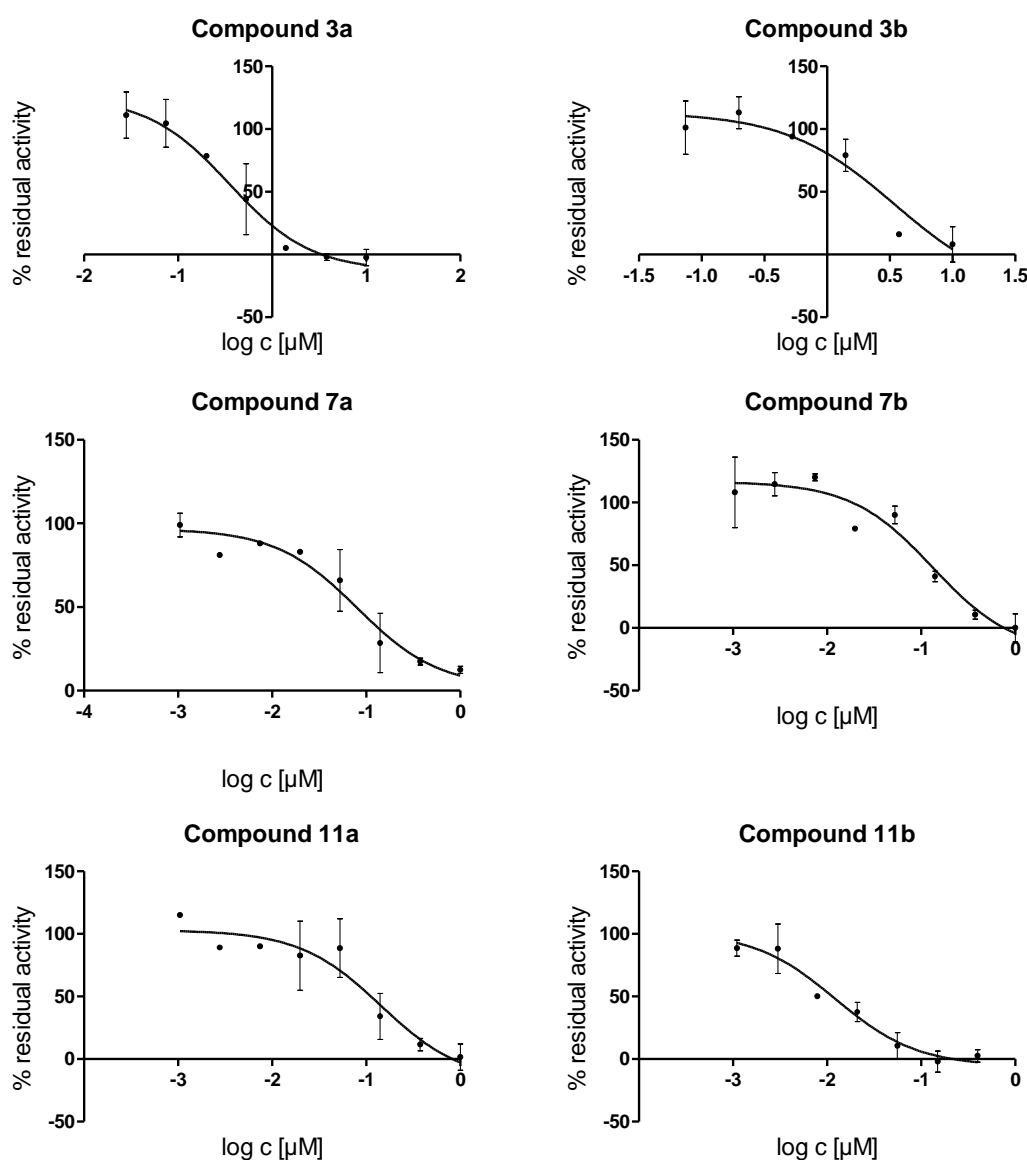

**Figure S1.** Dose-response curves for compounds 3a, 3b, 7a, 7b, 11a, and 11b for *E. coli* DNA gyrase.

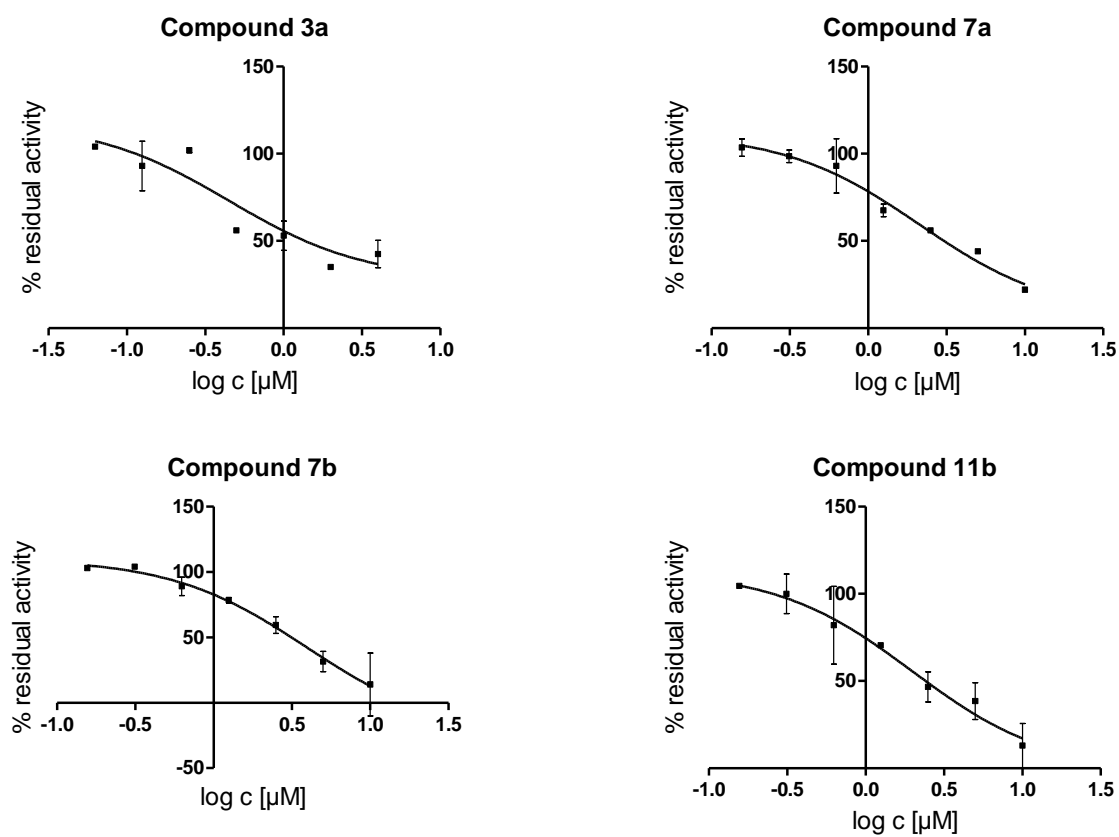

Figure S2. Dose-response curves for compounds 3a, 7a, 7b, and 11b for *E. coli* topoisomerase IV.

2.  $^1\text{H}$  NMR Spectra and HPLC Chromatograms of Final Compounds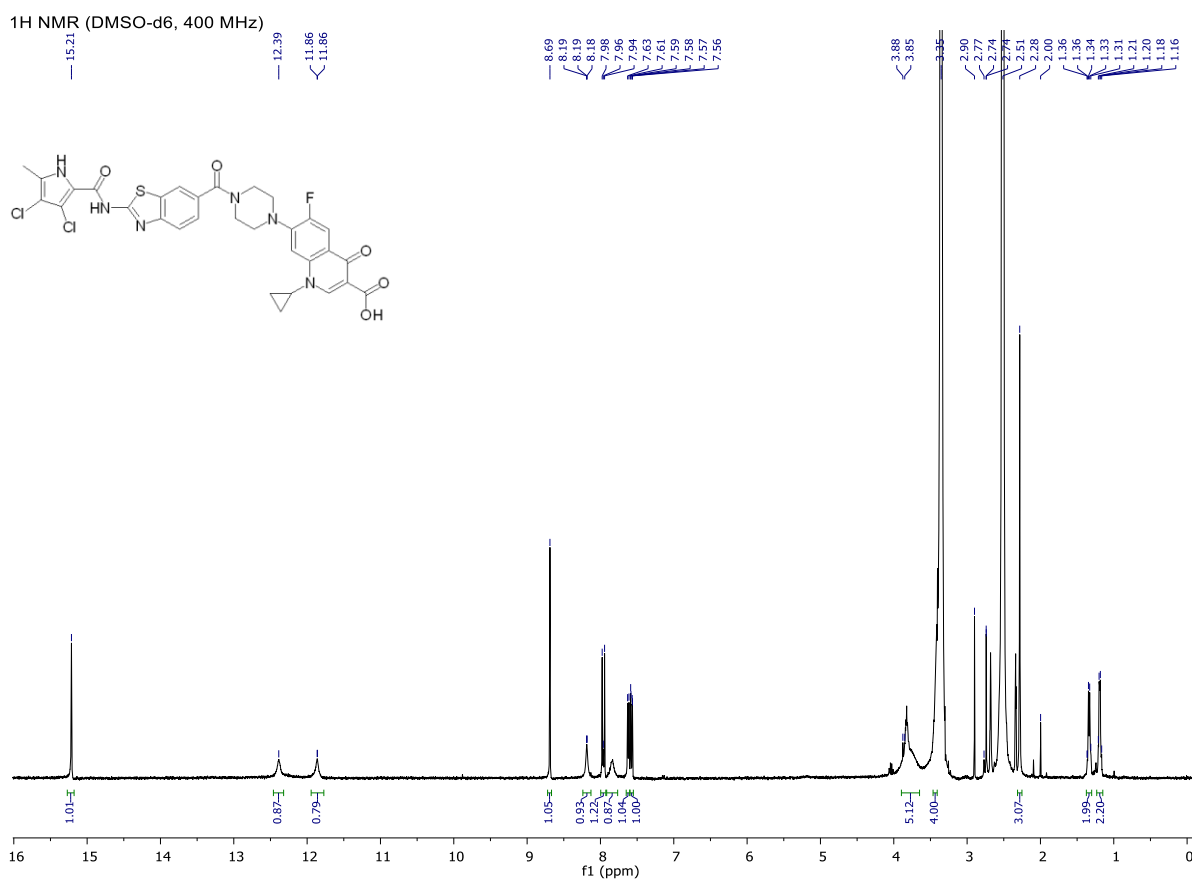Figure S3.  $^1\text{H}$  NMR spectra of compound 3a.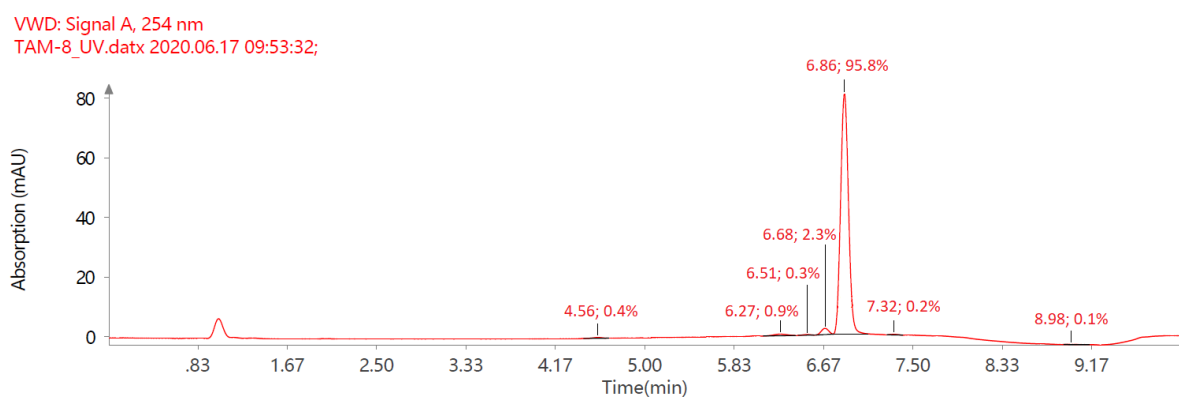

Figure S4. HPLC chromatogram of compound 3a.

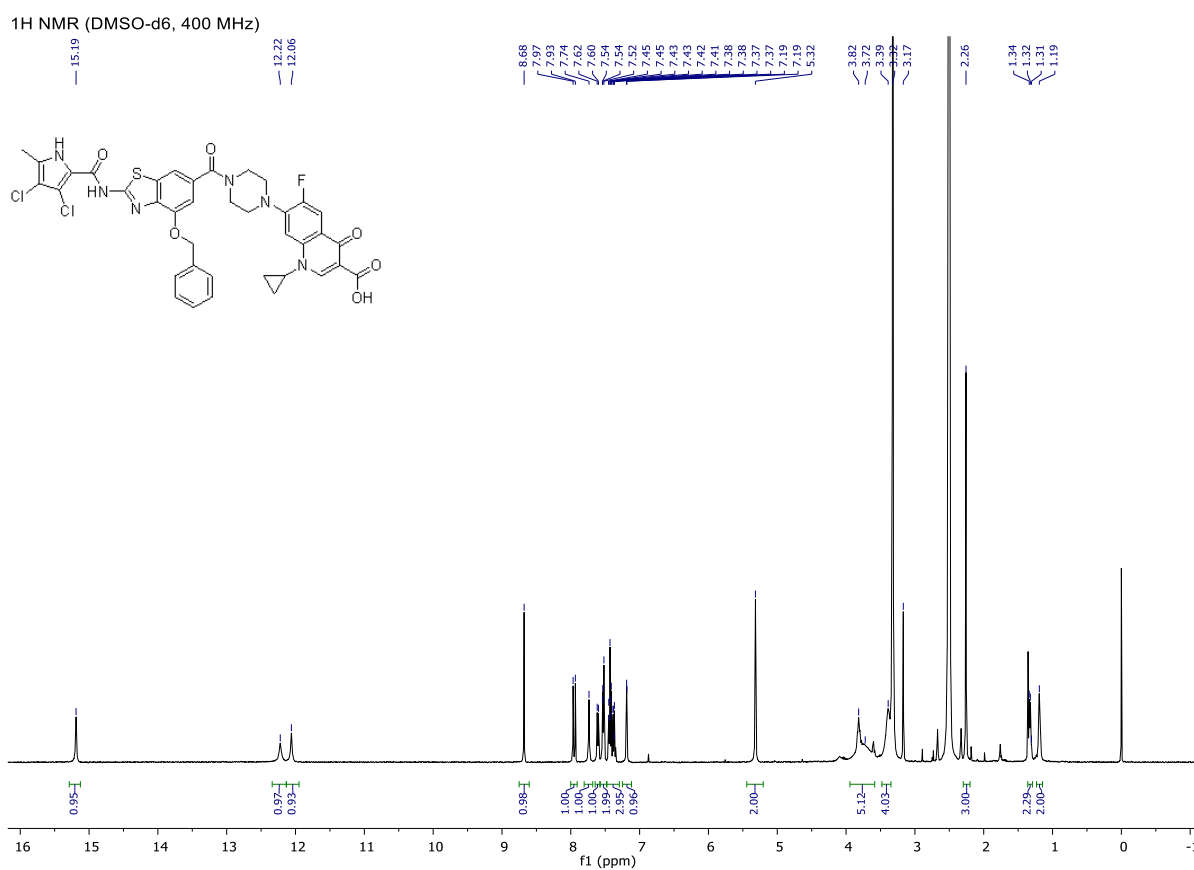Figure S5. <sup>1</sup>H NMR spectra of compound **3b**.

VWD: Signal A, 254 nm  
LMD-283-po kol\_UV.datx 2020.06.04 10:51:08;

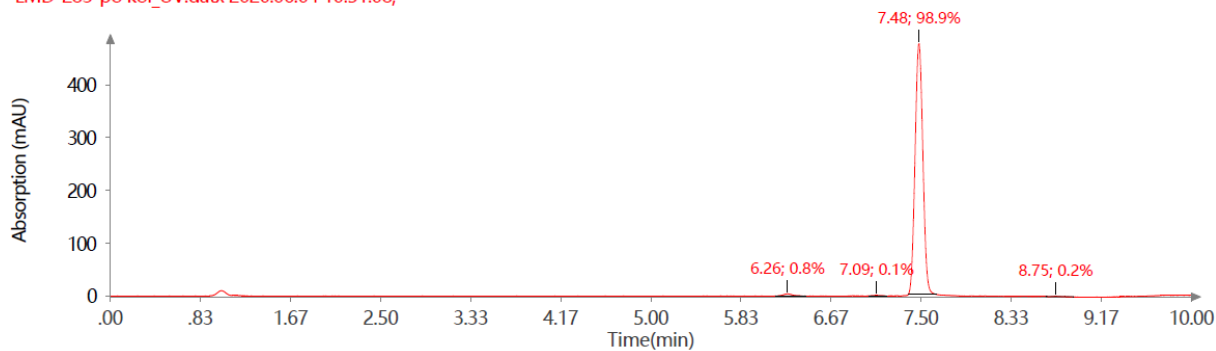Figure S6. HPLC chromatogram of compound **3b**.

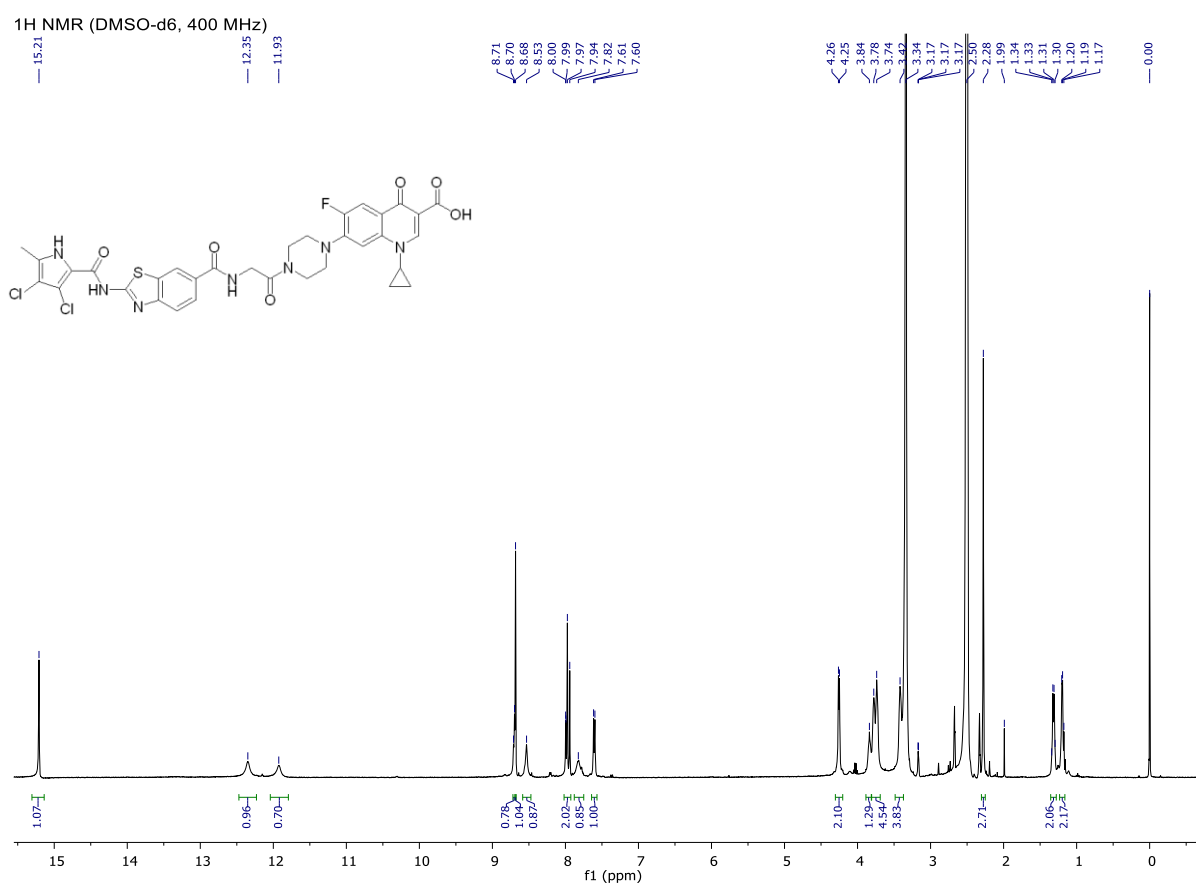Figure S7. <sup>1</sup>H NMR spectra of compound 7a.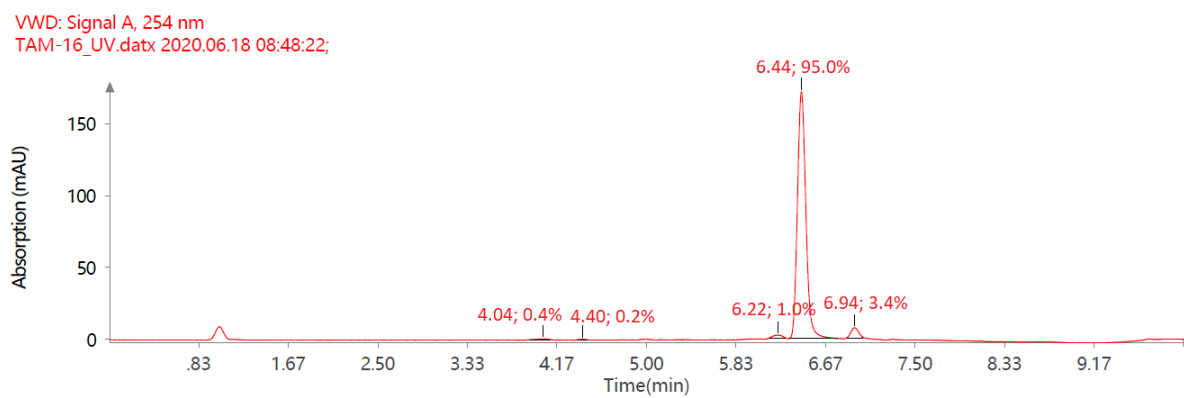

Figure S8. HPLC chromatogram of compound 7a.

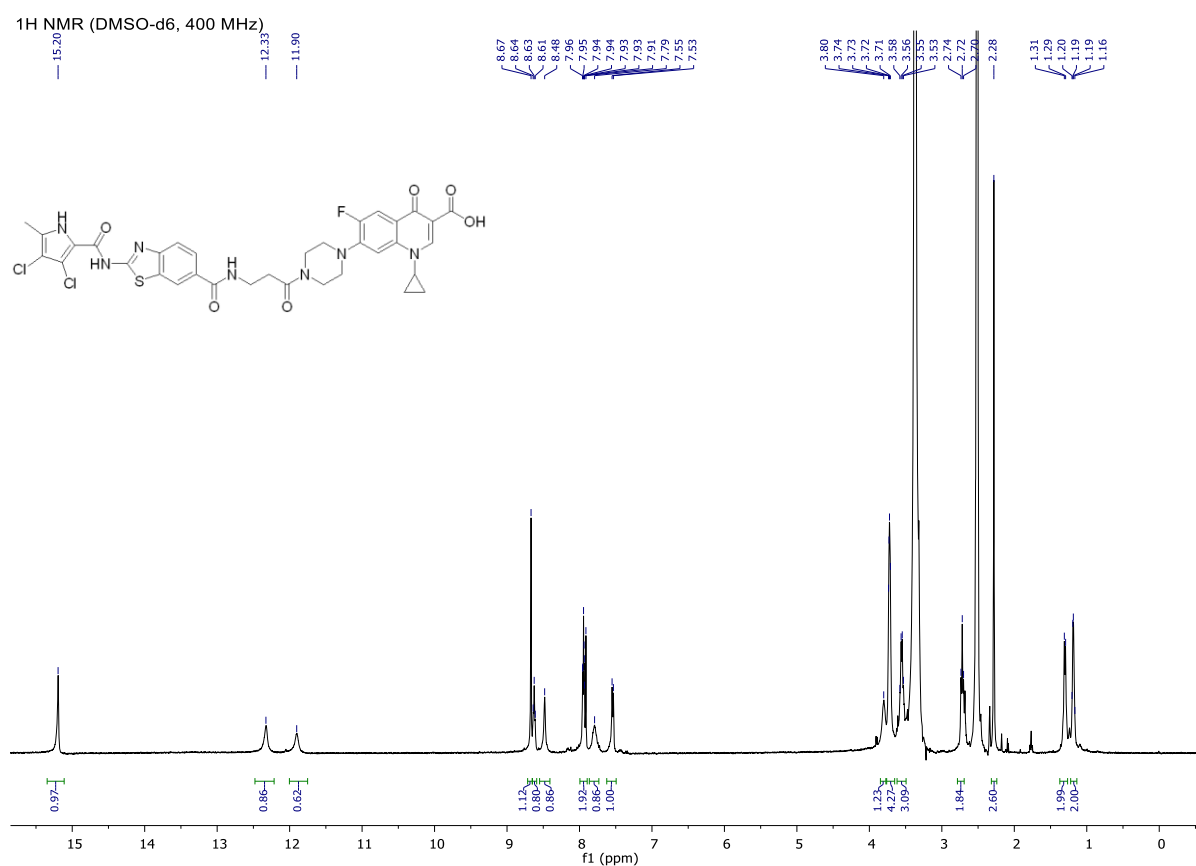Figure S9. <sup>1</sup>H NMR spectra of compound 7b.

VWD: Signal A, 254 nm

TAM-15A\_UV.datx 2020.06.17 09:42:51;

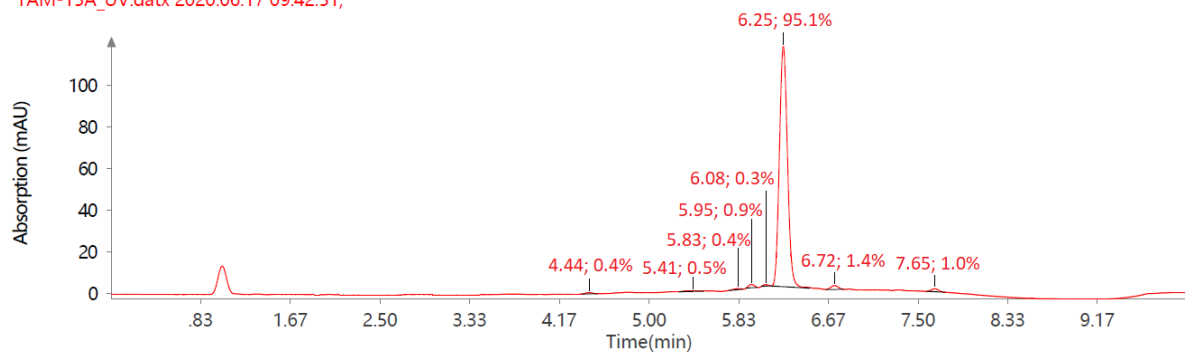

Figure S10. HPLC chromatogram of compound 7b.

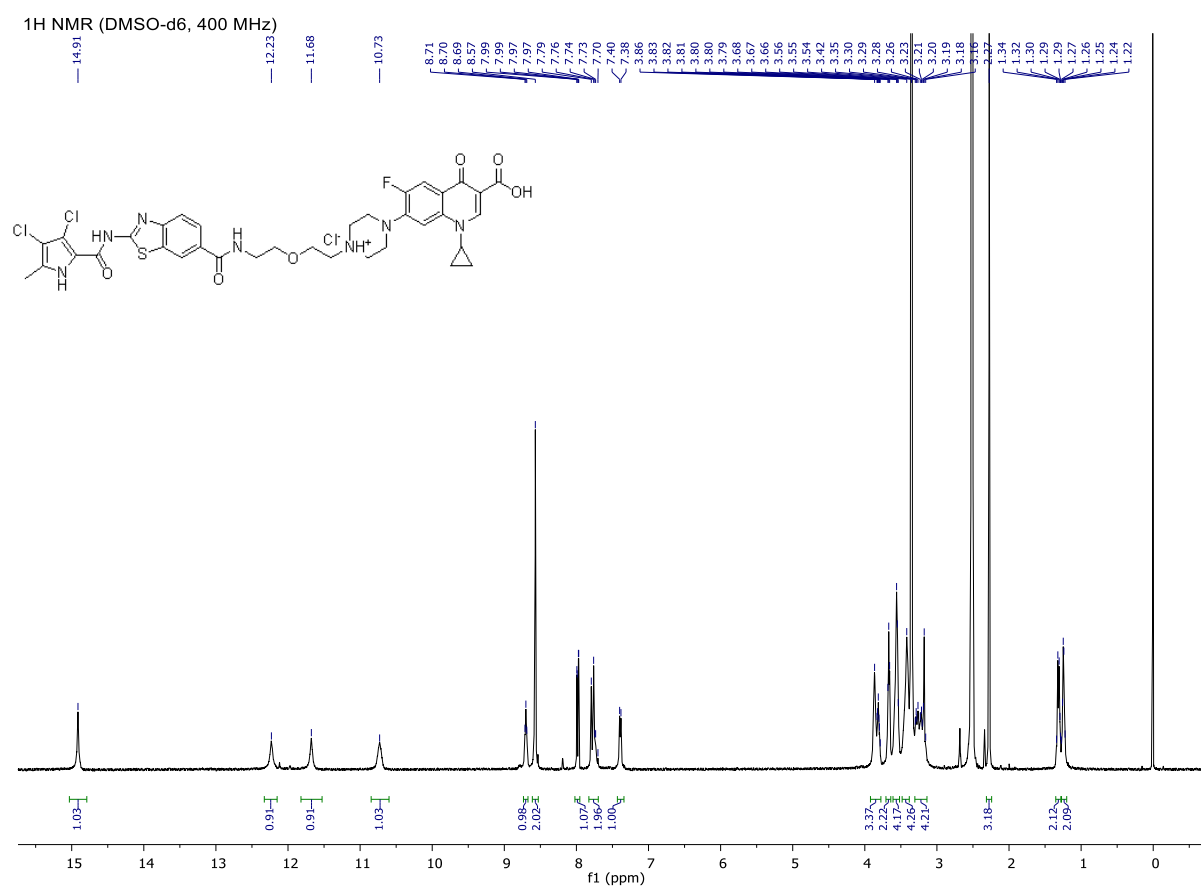Figure S11. <sup>1</sup>H NMR spectra of compound 11a.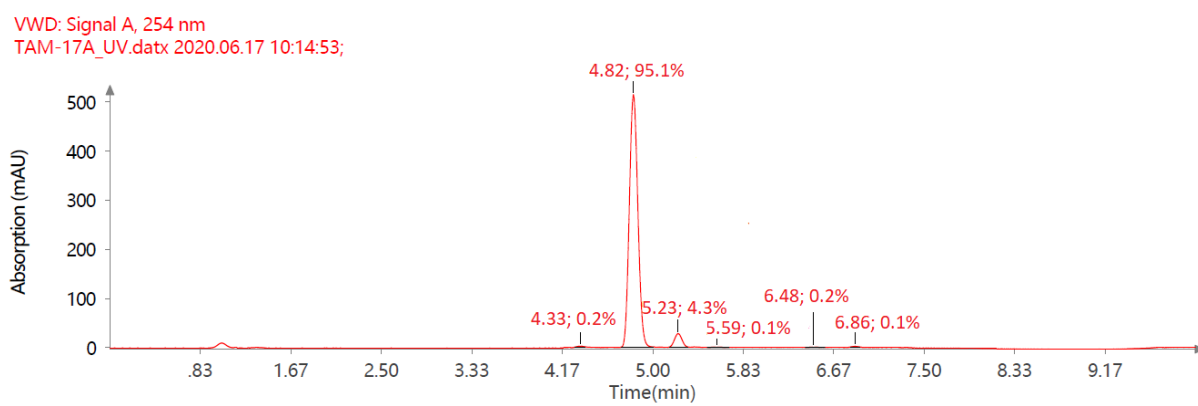

Figure S12. HPLC chromatogram of compound 11a.

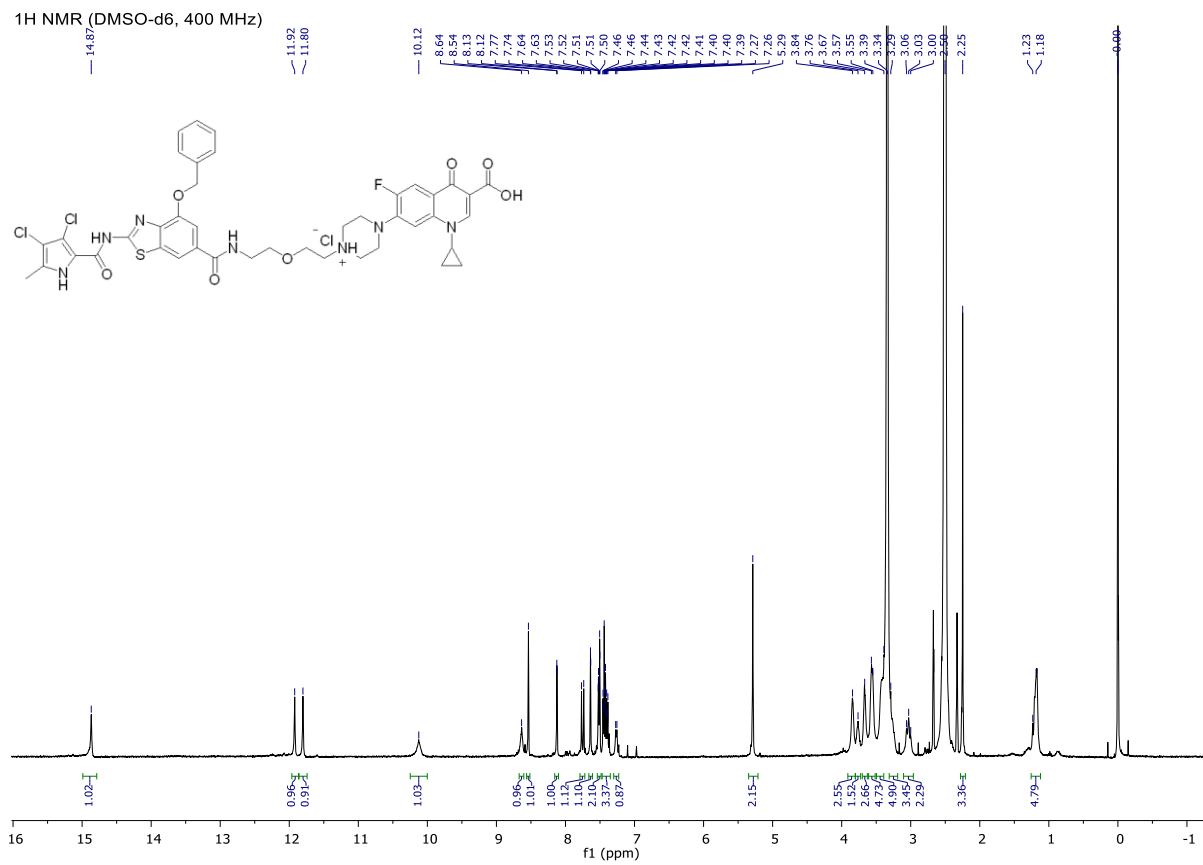Figure S13. <sup>1</sup>H NMR spectra of compound 11b.

VWD: Signal A, 254 nm  
TAM-22\_UV.datx 2020.06.17 14:03:26;

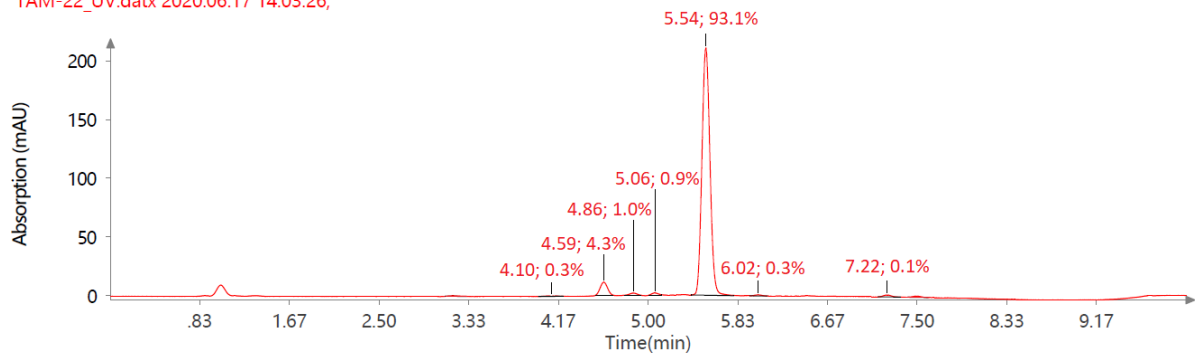

Figure S14. HPLC chromatogram of compound 11b.
